# Supplementary material for: Epitranscriptomic 5-Methylcytosine Profile in PM2.5-induced Mouse Pulmonary Fibrosis
Source: PubMed Central journal article supplement (PMC7393542; doi:10.1016/j.gpb.2019.11.005), 2020-03-03

**A**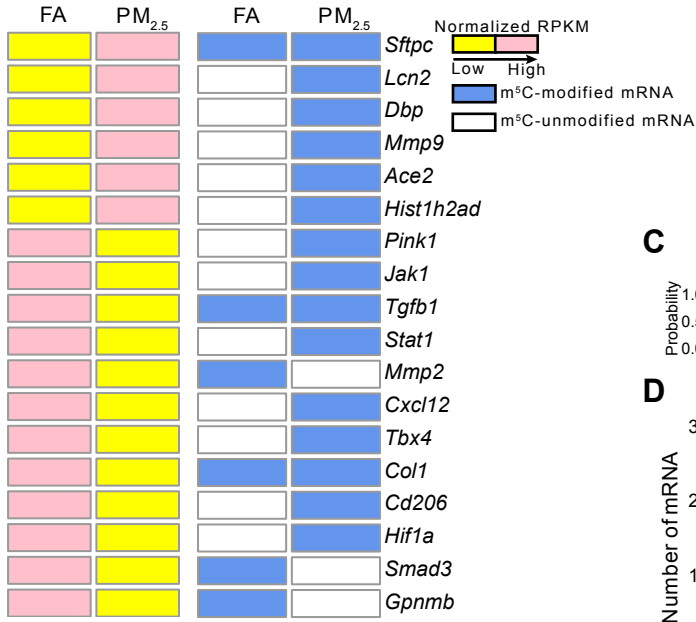**B**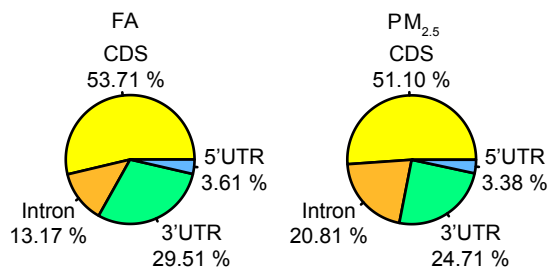**C**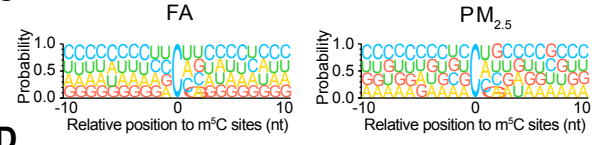**D**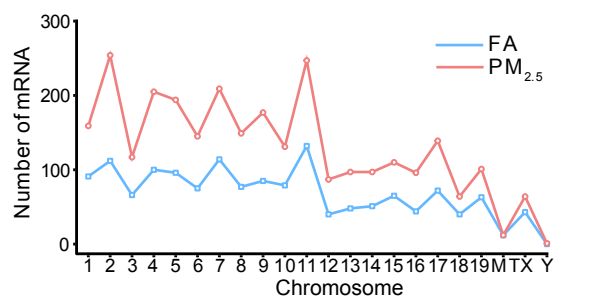

Supplement: mmc1.pdf [file mmc1.pdf]
