# Supplementary material for: Epitranscriptomic 5-Methylcytosine Profile in PM2.5-induced Mouse Pulmonary Fibrosis
Source: PubMed Central journal article supplement (PMC7393542; doi:10.1016/j.gpb.2019.11.005), 2020-03-03
Supplement: mmc3.pdf [file mmc3.pdf]

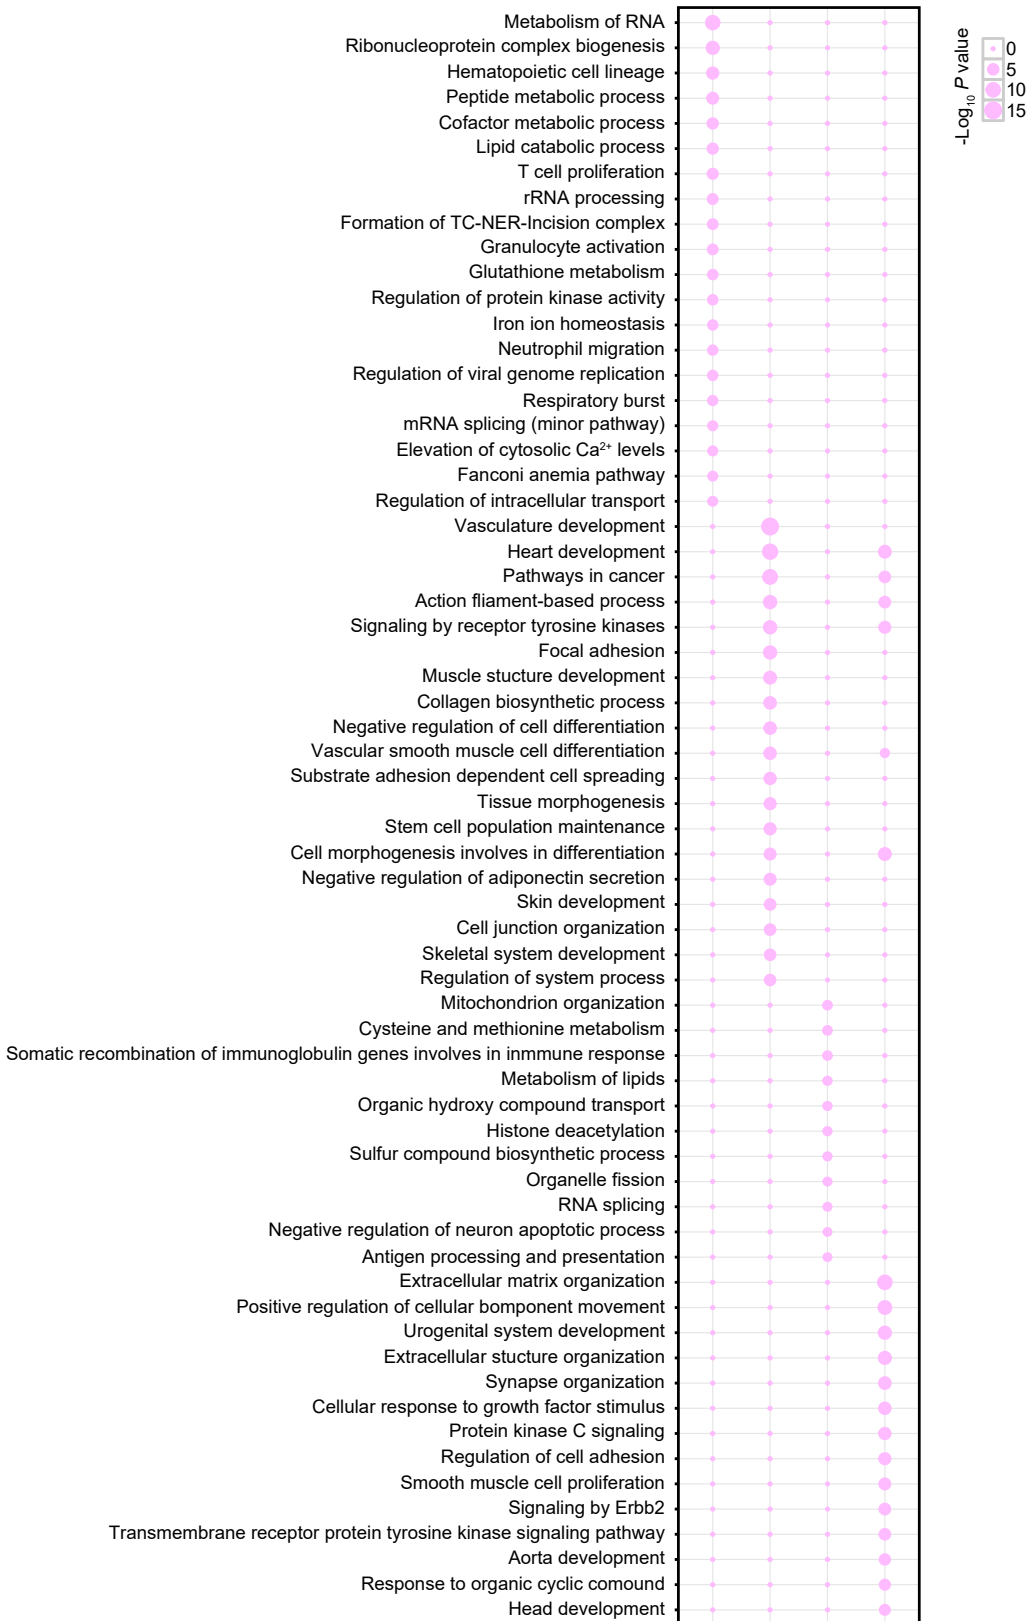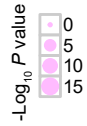

Upregulated DEGs with m<sup>13</sup>C gain  
 Downregulated DEGs with m<sup>13</sup>C gain  
 Upregulated DEGs with m<sup>13</sup>C loss  
 Downregulated DEGs with m<sup>13</sup>C loss
