# Supplementary material for: Epitranscriptomic 5-Methylcytosine Profile in PM2.5-induced Mouse Pulmonary Fibrosis
Source: PubMed Central journal article supplement (PMC7393542; doi:10.1016/j.gpb.2019.11.005), 2020-03-03

IL-17 SIGNALING PATHWAY

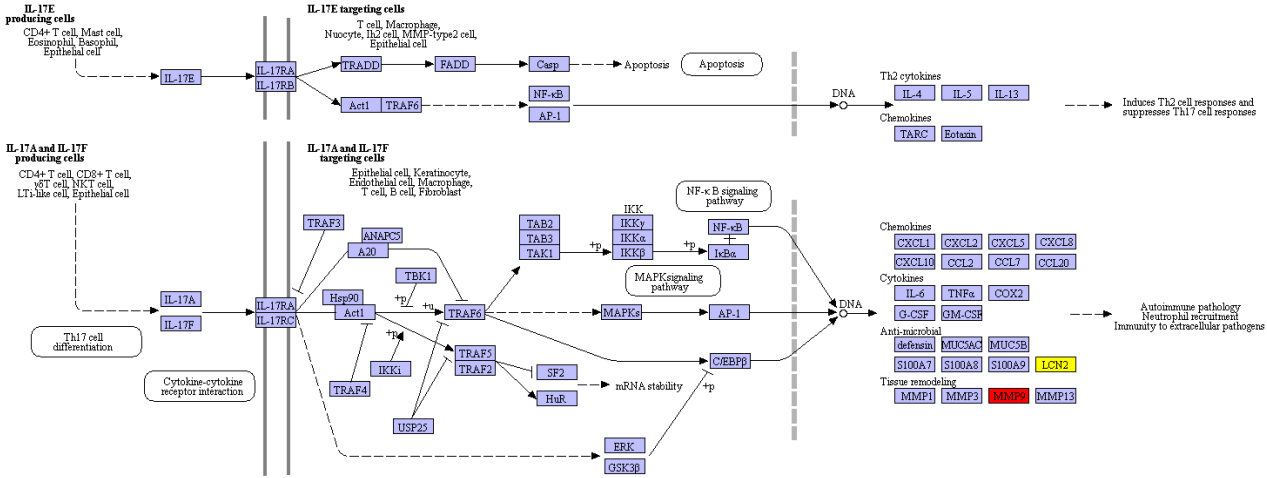

Supplement: mmc4.pdf [file mmc4.pdf]
